# Supplementary material
Source: Springer Nature journal article supplement (https://www.springermedizin.de/resource/supplementary/12985_2010_918_MOESM2_ESM.pdf/9608738)

**A.**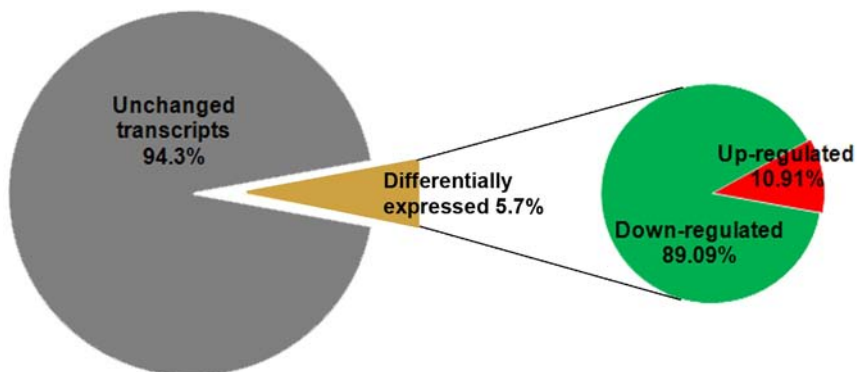**B.**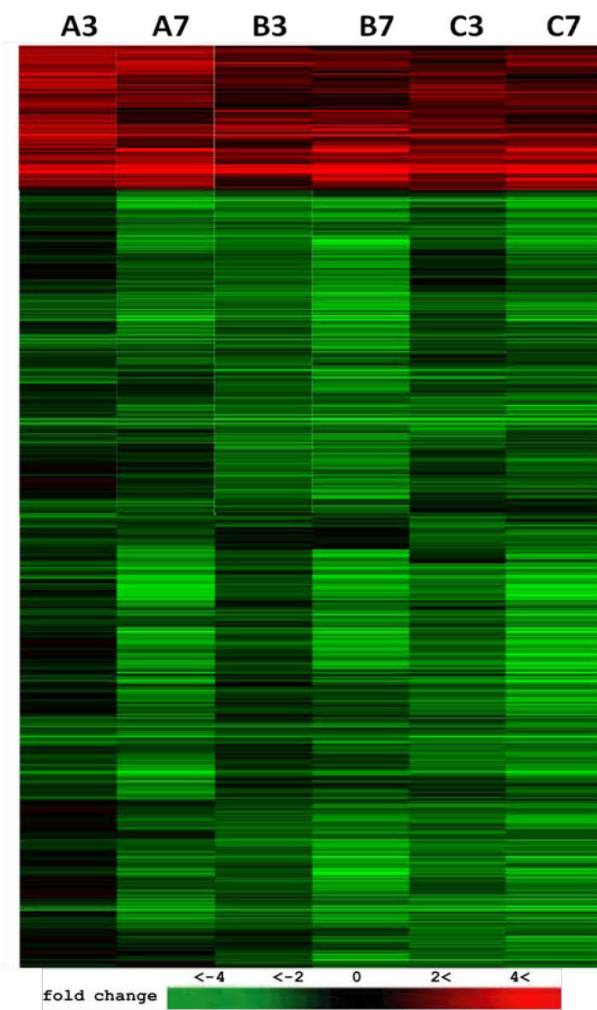

Supplement: MOESM2 [file 9608738]
